# Supplementary material for: Induction of autophagy promotes the growth of early preneoplastic rat liver nodules
Source: PubMed Central journal article supplement (PMC4868721; doi:10.18632/oncotarget.6810), 2015-12-31
Supplement: oncotarget-07-5788-s001.pdf [file oncotarget-07-5788-s001.pdf]

## Induction of autophagy promotes the growth of early preneoplastic rat liver nodules

### Supplementary Material

**Supp. Table 1.** Primers used for qRT-PCR analysis.

| <b>Gene Symbol</b> | <b>Forward Primer</b>   | <b>Reverse Primer</b>   |
|--------------------|-------------------------|-------------------------|
| <b>Ulk1</b>        | GGCTTACAGACTGCCATTGA    | GATACCACGCTGGCCTTATAC   |
| <b>Ambra1</b>      | ATACTACGCCCAGAGGATGA    | GAAGAAGAGGAGGTGGAAGAAC  |
| <b>Beclin1</b>     | CAGGAACTCACAGCTCCATTAC  | CCATCCTGGCGAGTTTCAATA   |
| <b>Atg12</b>       | GCCTCGGAGCAGTTGTTTA     | ATGTAGGACCAGTTTACCATCAC |
| <b>Atg5</b>        | TCCAACGTGCTTTACTCTCTATC | TGTCAGTTACCAGCGTCAAATA  |
| <b>p62</b>         | CTAGGCATCGAGGTTGACATT   | CTTGGCTGAGTACCACTCTTATC |
| <b>FoxO3</b>       | CCCAACCAGCTCCTTTAACA    | GTAGTGCGACACGGAAGAAA    |
| <b>Gapdh</b>       | ACTCCATTCTTCCACCTTTG    | CCCTGTTGCTGTAGCCATATT   |

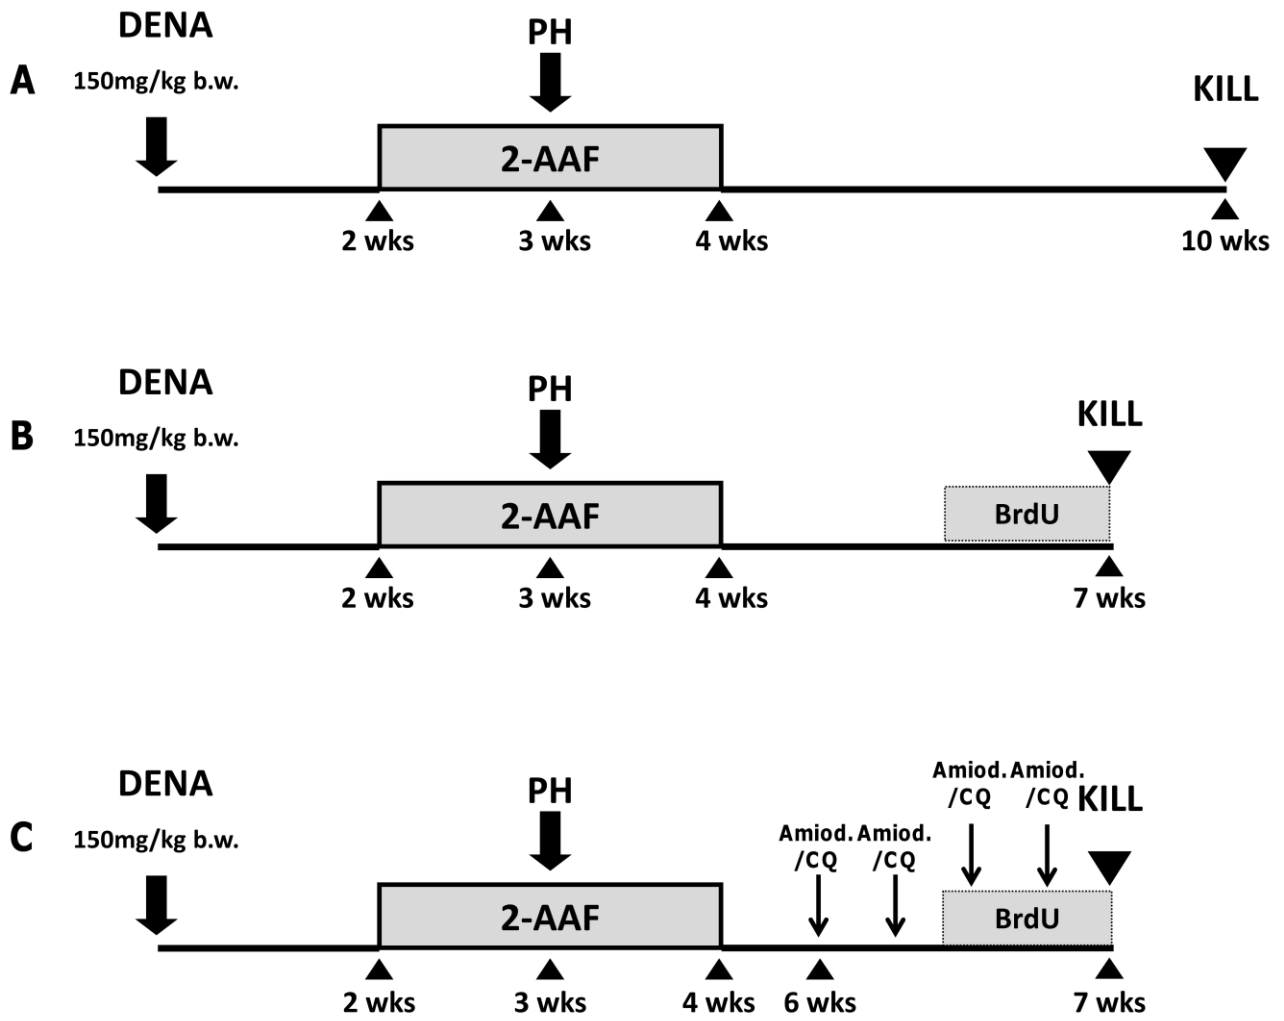

Supp. Figure 1 :
